# Supplementary material
Source: Springer Nature journal article supplement (https://www.springermedizin.de/resource/supplementary/12879_2011_1690_MOESM5_ESM.pdf/9443920)

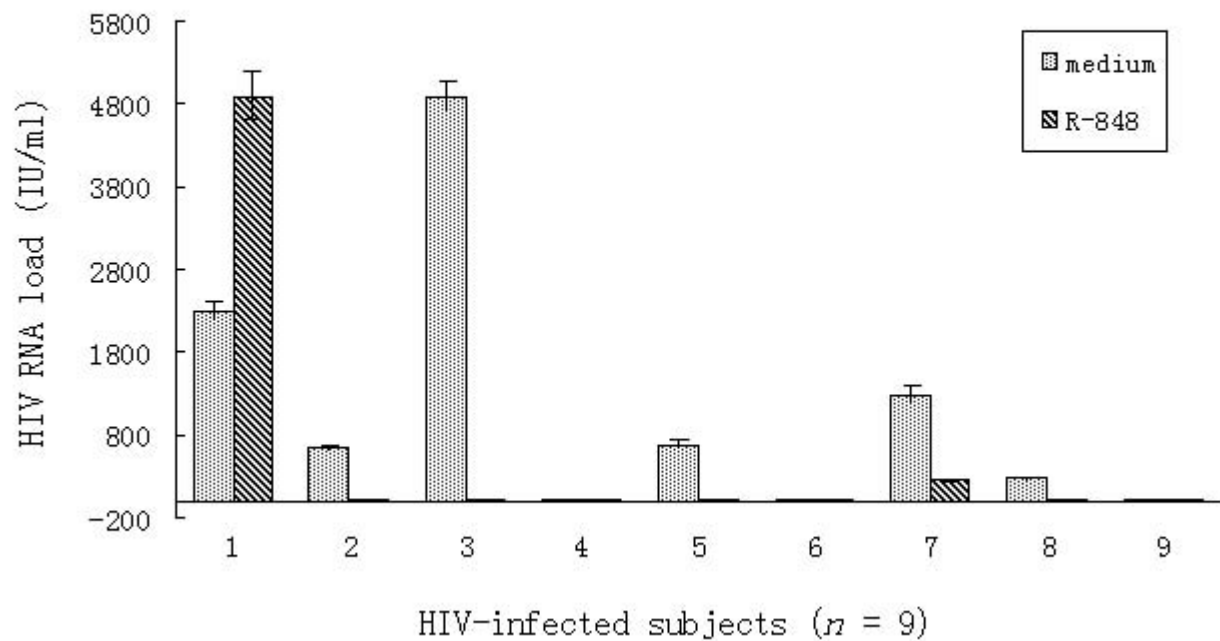

Supplement: MOESM5 [file 9443920]
